# Supplementary material for: Tspan9 Induces EMT and Promotes Osteosarcoma Metastasis via Activating FAK-Ras-ERK1/2 Pathway
Source: PubMed Central journal article supplement (PMC8906905; doi:10.3389/fonc.2022.774988), 2022-02-23
Supplement: Image_1.pdf [file Image_1.pdf]

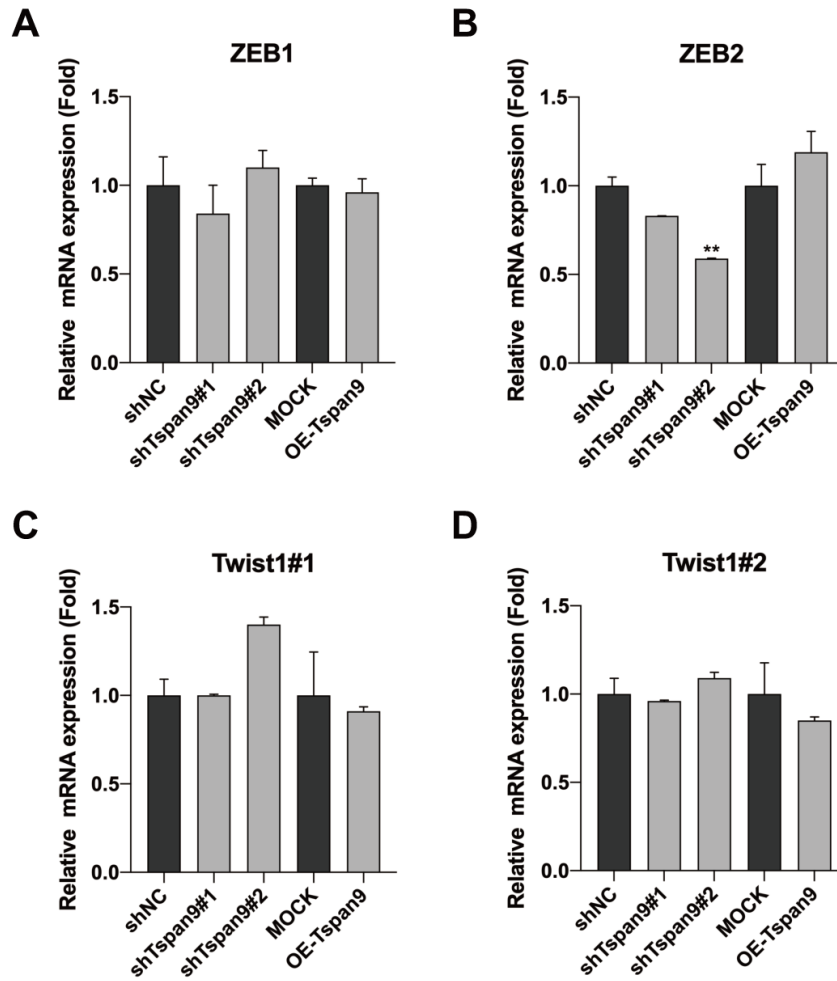

**Figure S1.** Relative changes of ZEB and Twist families following knockdown and overexpression of Tspan9 in OS cells were examined using qRT-PCR. **(A-D)** No significant alterations in the mRNA levels of ZEB1, ZEB2 and Twist1 were observed. ZEB, zincfinger E-box binding homeobox; Twist, twist family bHLH transcription factor.
