# Supplementary material for: Tspan9 Induces EMT and Promotes Osteosarcoma Metastasis via Activating FAK-Ras-ERK1/2 Pathway
Source: PubMed Central journal article supplement (PMC8906905; doi:10.3389/fonc.2022.774988), 2022-02-23
Supplement: Image_2.pdf [file Image_2.pdf]

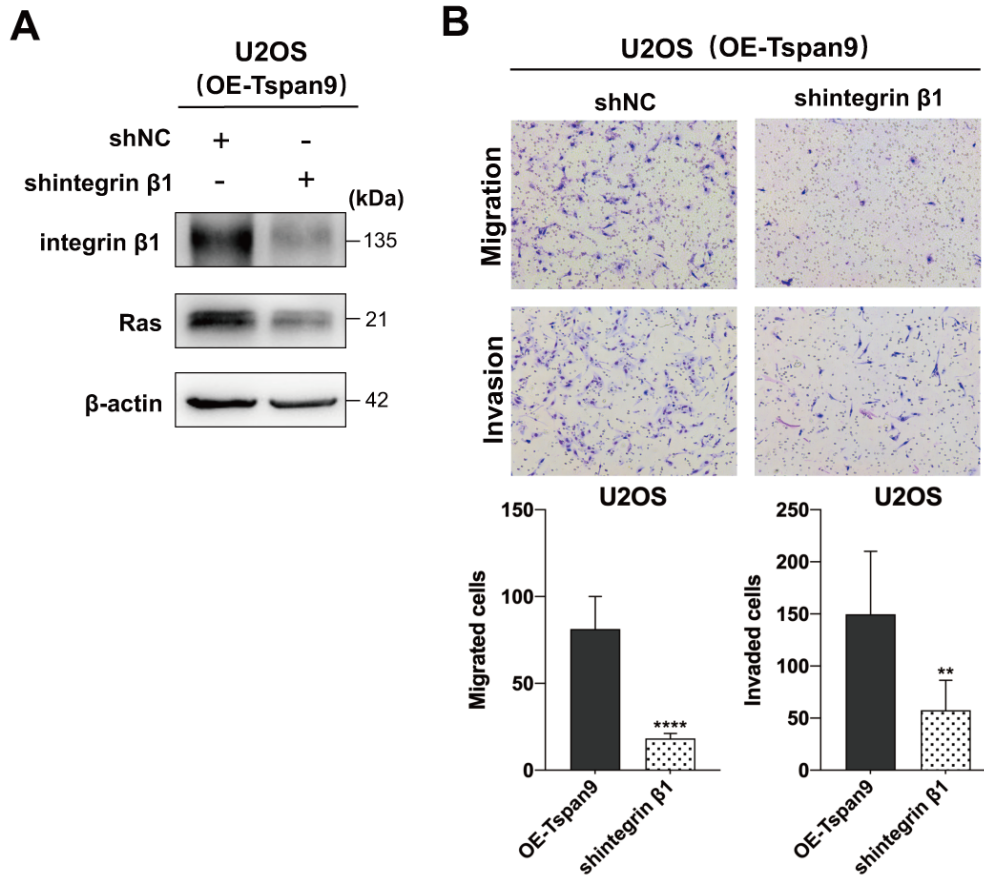

**Figure S2.** Knockdown of  $\beta$ 1 integrin inhibits downstream Ras expression and the metastasis of OS cells in vitro. **(A)** Knockdown efficiency of integrin  $\beta$ 1 in Tspan9-overexpression U2OS cells and regulation of downstream Ras were confirmed by Western blotting. **(B)** The impact of integrin  $\beta$ 1 knockdown on OS cell migration and invasion was assessed via a Transwell approach. All analyzes were repeated two or three times. Data are means  $\pm$  SD. \*\* $P < 0.01$ ; \*\*\*\* $P < 0.0001$ .
